# Supplementary material for: Repositioning metformin and propranolol for colorectal and triple negative breast cancers treatment
Source: PubMed Central journal article supplement (PMC8047046; doi:10.1038/s41598-021-87525-z), 2021-04-14

## **Repositioning metformin and propranolol for colorectal and triple negative breast cancers treatment**

LE Anselmino<sup>1,2</sup>, MV Baglioni<sup>2,3</sup>, F Malizia<sup>1,2</sup>, N Cesatti Laluce<sup>1,2</sup>, C Borini Etichetti<sup>2,4</sup>, VL Martínez Marignac<sup>2,5</sup>, V Rozados<sup>2,3</sup>, OG Scharovsky<sup>2,3</sup>, J Girardini<sup>1,2</sup>, MJ Rico<sup>2,3</sup>, M Menacho Márquez<sup>1,2,6\*</sup>.

**Running title:** Combination of repositioned drugs prevents colorectal and triple negative breast cancers growth and development

### **Affiliations**

<sup>1</sup> Instituto de Inmunología Clínica y Experimental de Rosario. (IDICER, CONICET-UNR). Facultad de Ciencias Médicas (UNR). Santa Fe 3100, Rosario, Argentina.

<sup>2</sup> CONICET

<sup>3</sup> Instituto de Genética Experimental, Facultad de Ciencias Médicas. Santa Fe 3100, Rosario. Argentina.

<sup>4</sup> Instituto de Fisiología Experimental (IFISE, CONICET-UNR). Facultad de Ciencias Bioquímicas y Farmacéuticas (UNR), Suipacha 570, 2000, Rosario, Argentina.

<sup>5</sup> CICYTTP IBIOGEM, CONICET, Diamante, Argentina.

<sup>6</sup> Centro de Investigación y Producción de Reactivos Biológicos (CIPReB), Facultad de Ciencias Médicas. Suipacha 660, Rosario. Argentina

\*To whom correspondence should be addressed:

**E-mail:** mmenacho@conicet.gov.ar / **Phone:** +54-3413615828 / **Fax:** +54-3414804569

**Total number of figures and tables:** 5 main figures, 5 supplementary figures and 6 supplementary tables.

**A**

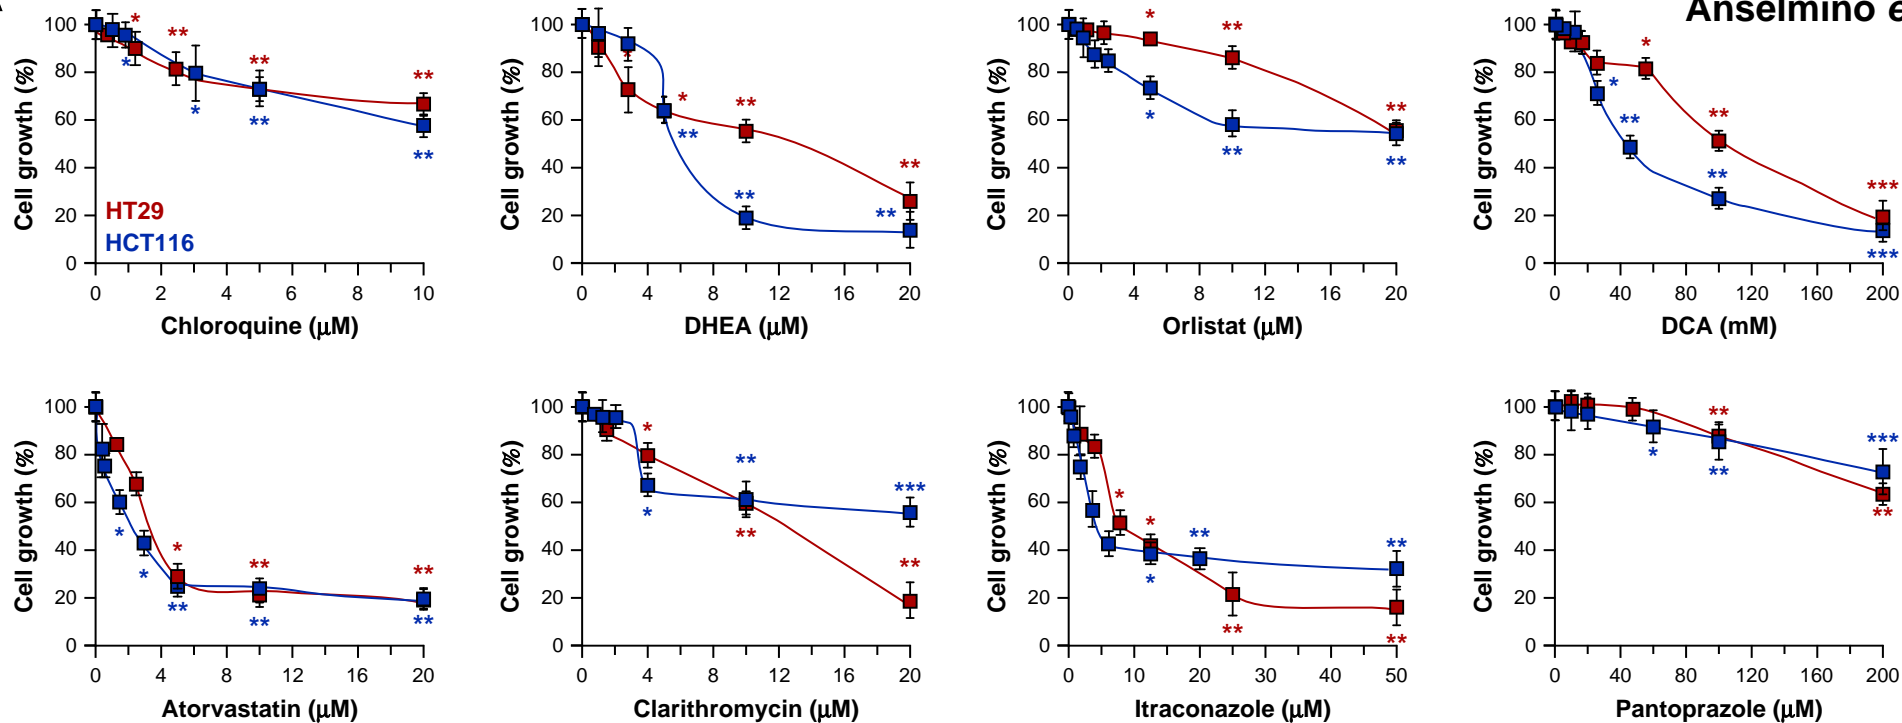

**B**

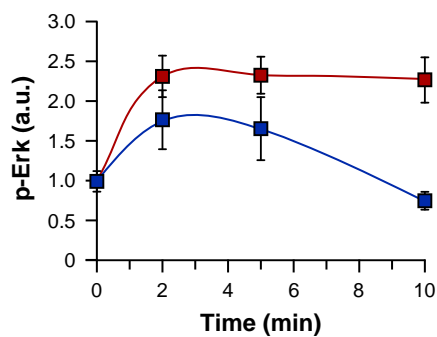

**C**

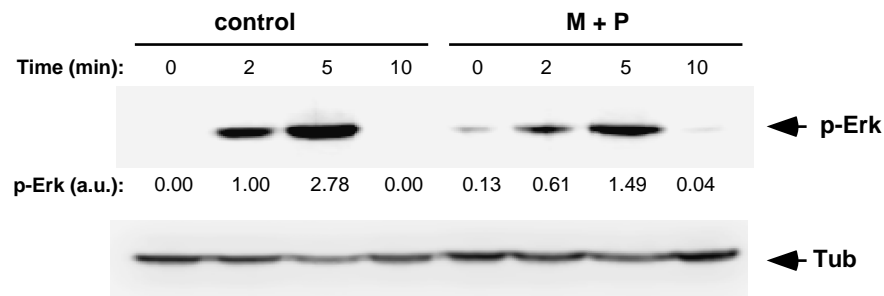

**D**

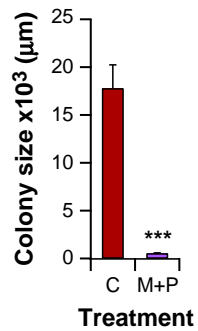

**E**

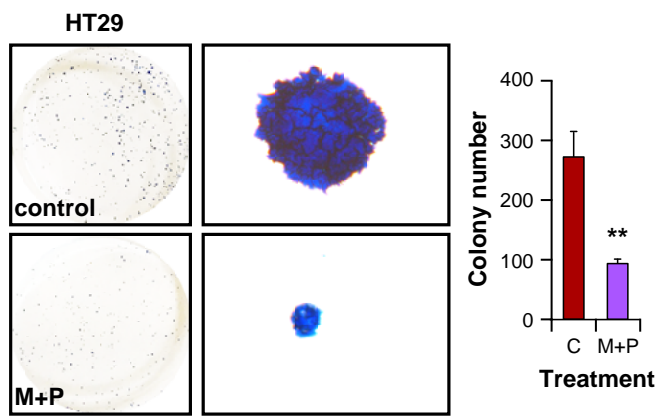

**F**

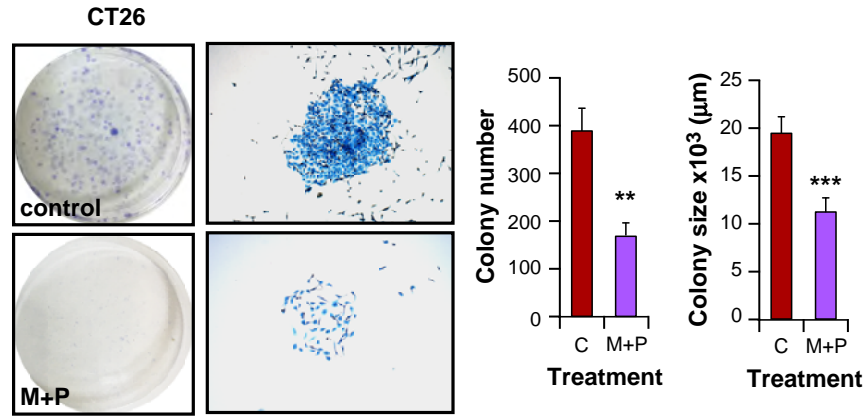

**A**

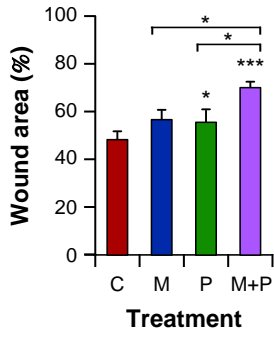

**B**

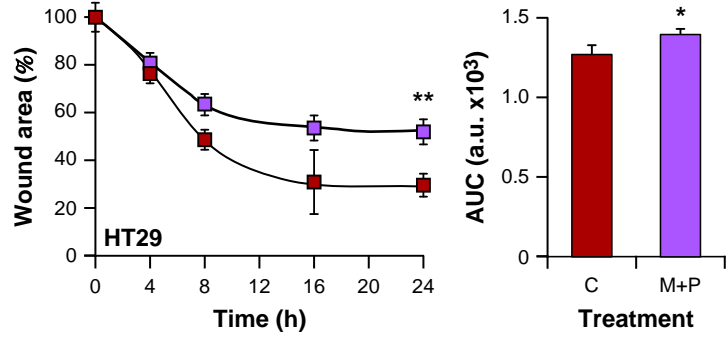

**C**

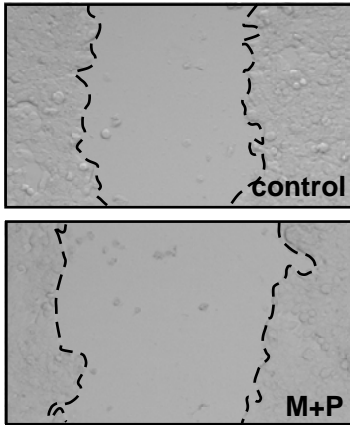

**D**

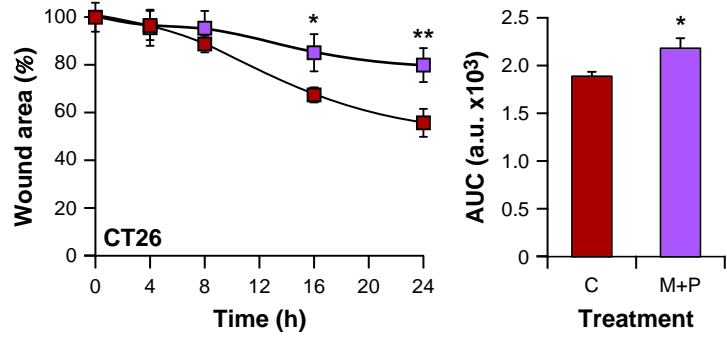

**E**

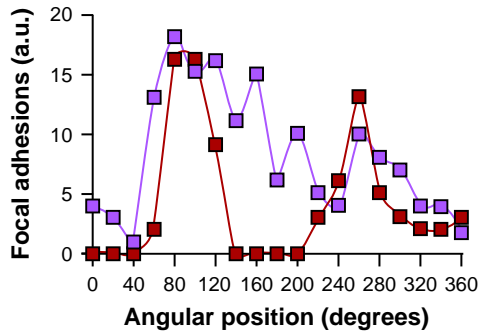

**F**

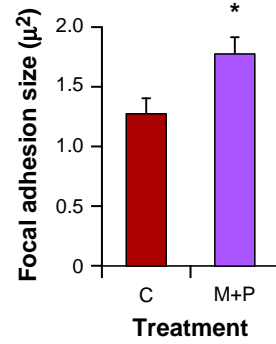

**G**

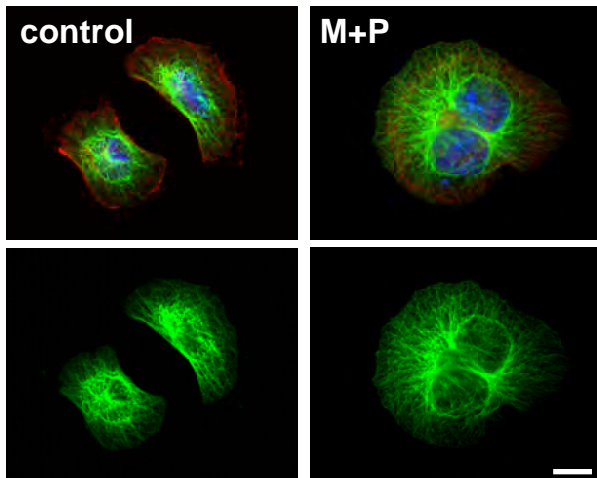

Tubulin - F-actin - DAPI

**H**

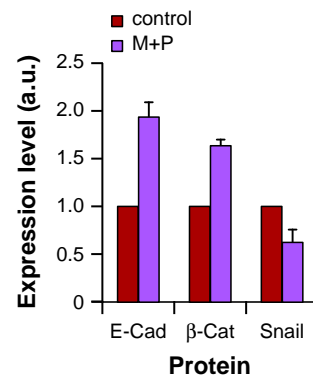

**I**

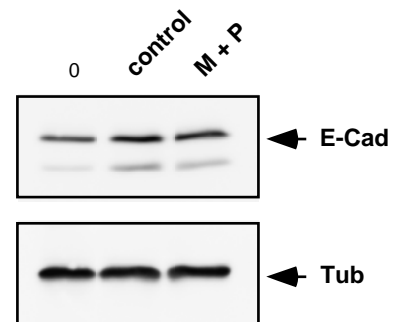

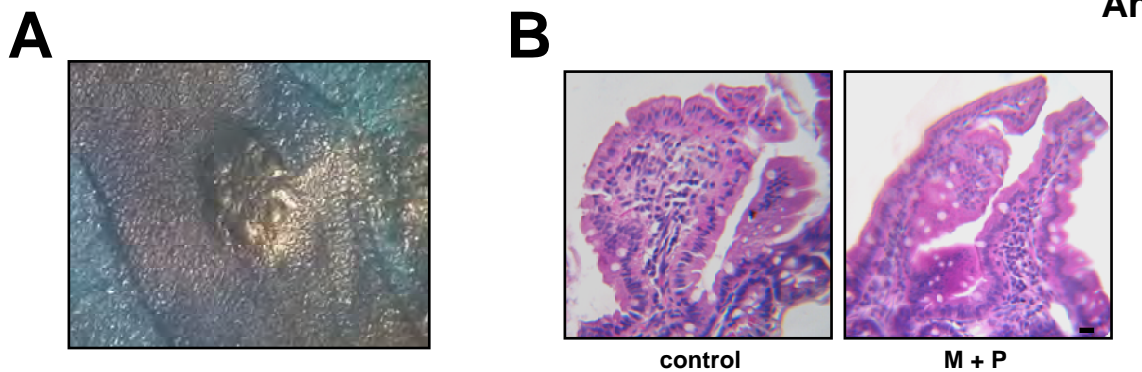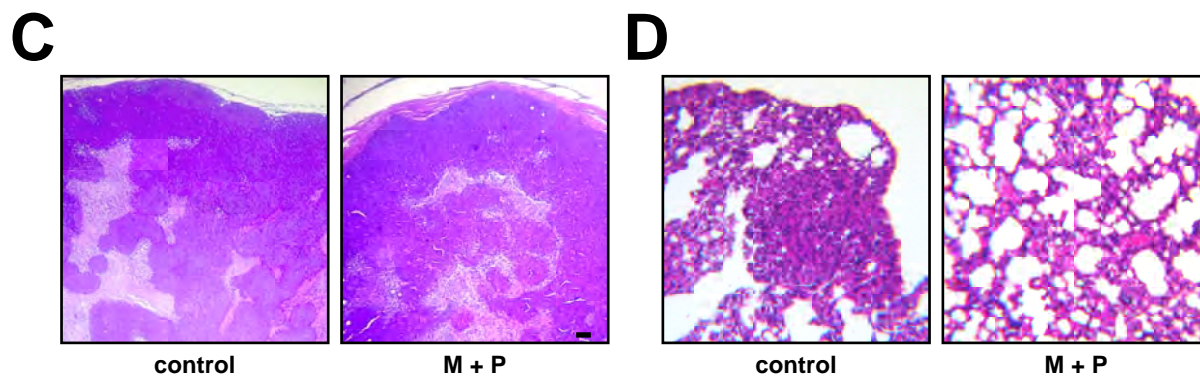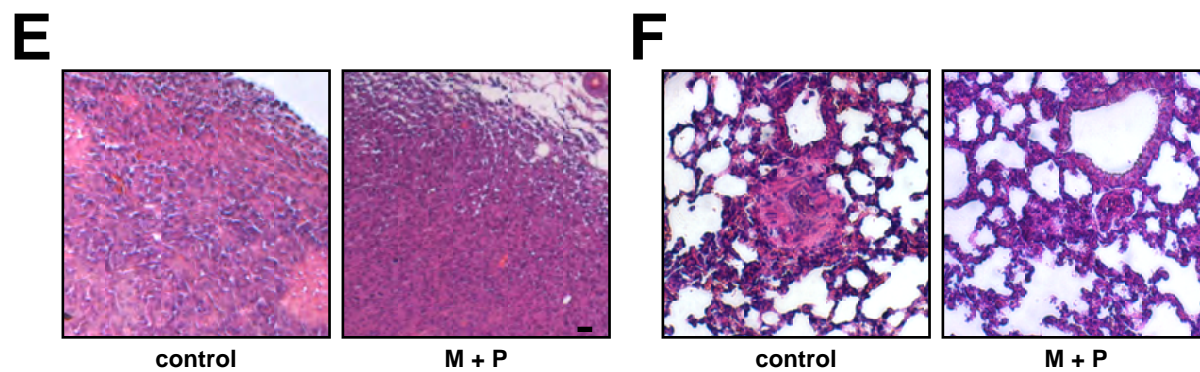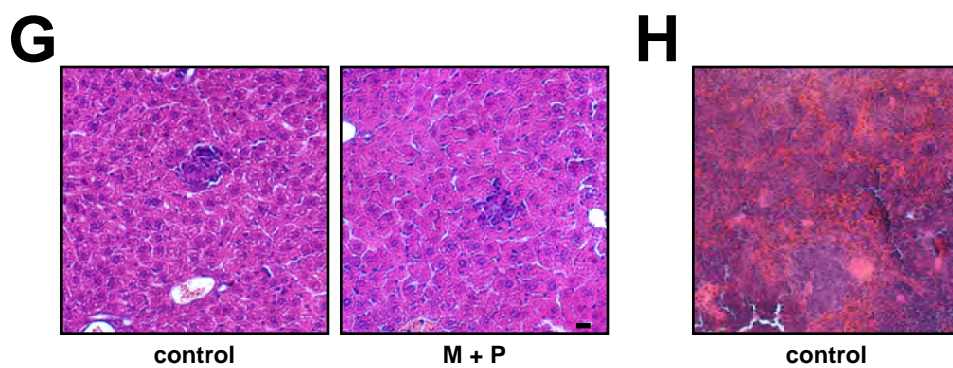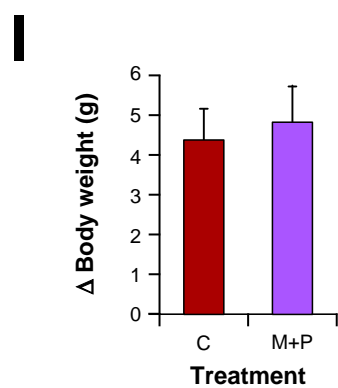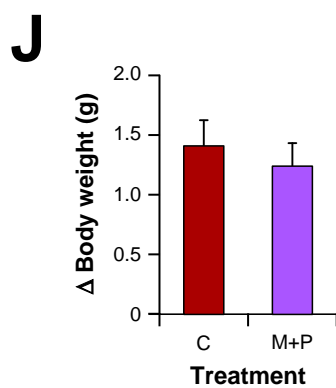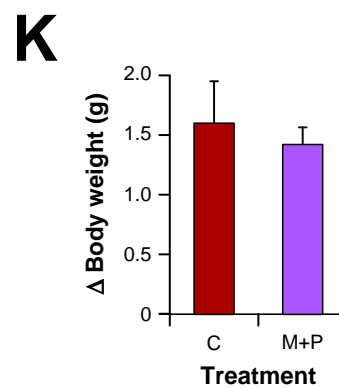

**A**

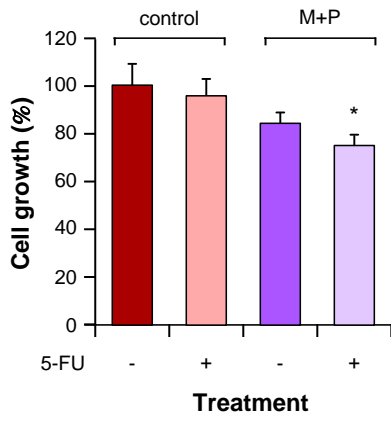

**B**

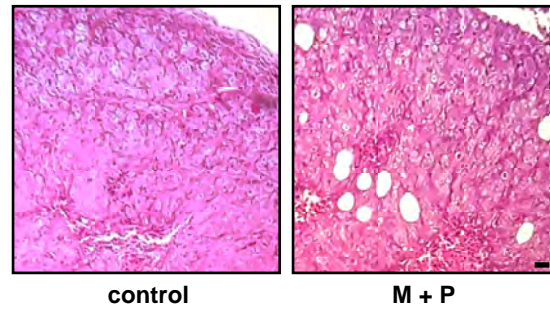

**C**

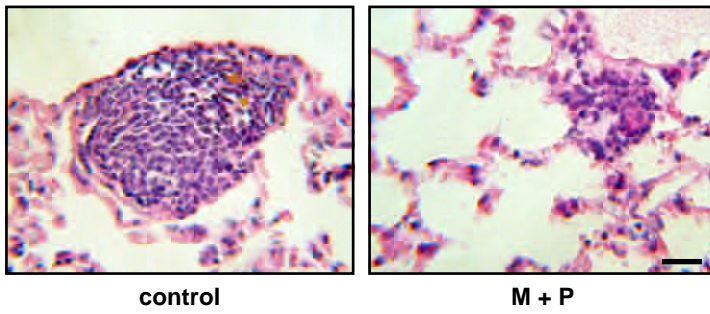

**D**

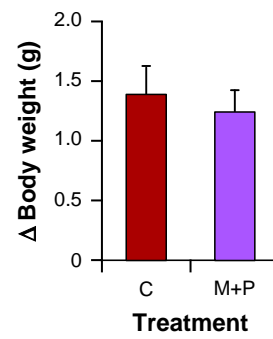

# Fig. 1G

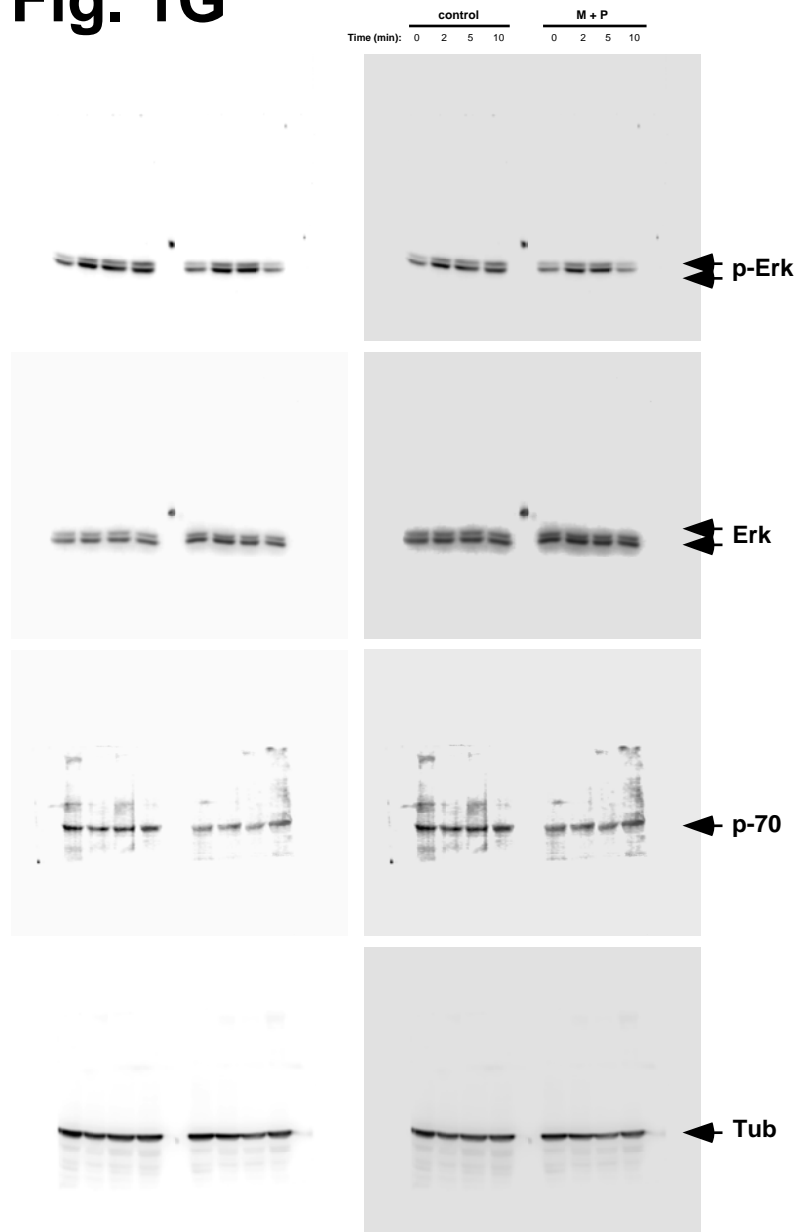

# Fig. 2D

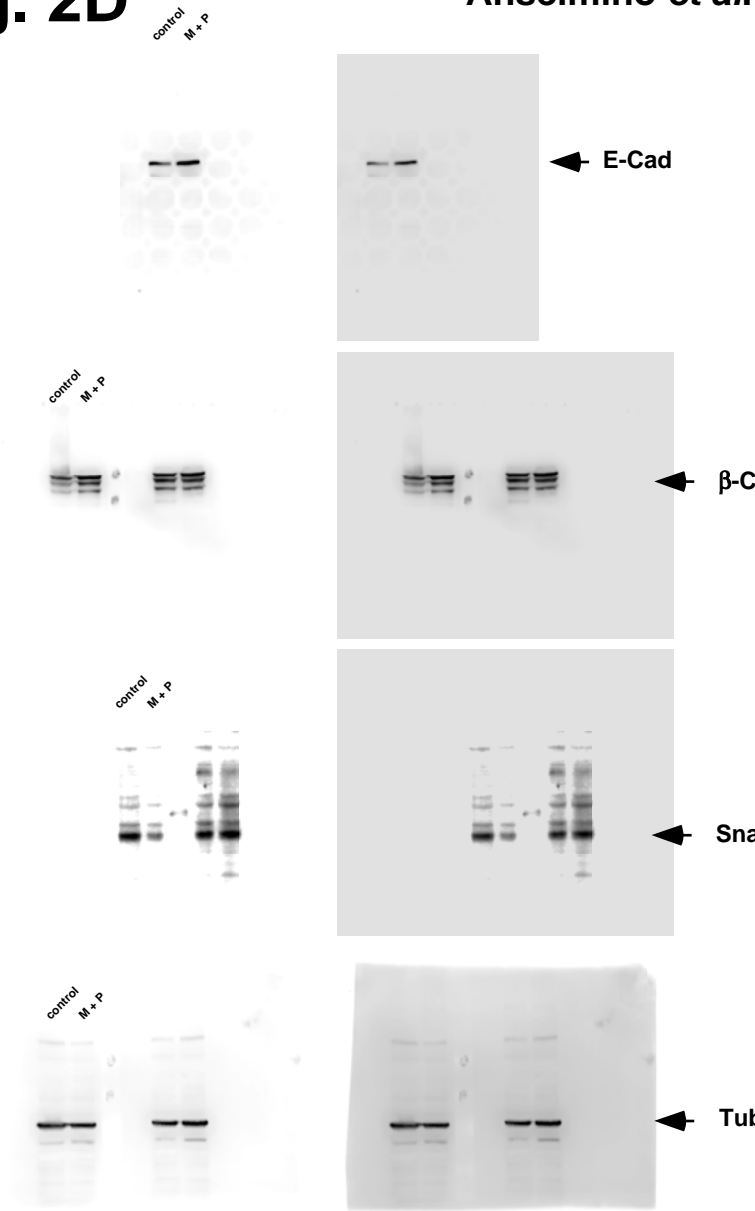

# Figure S-5 Anselmino et al.

# Fig. S1C

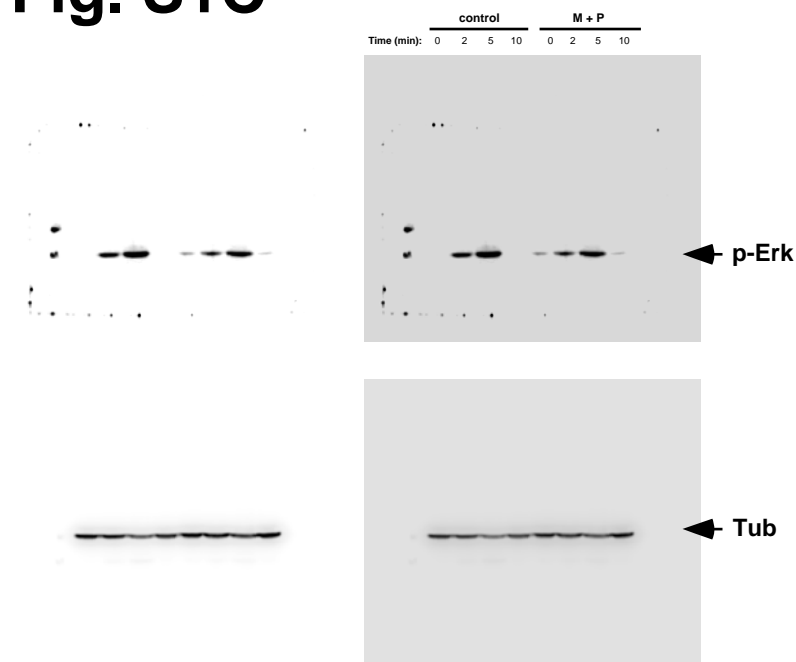

# Fig. S2I

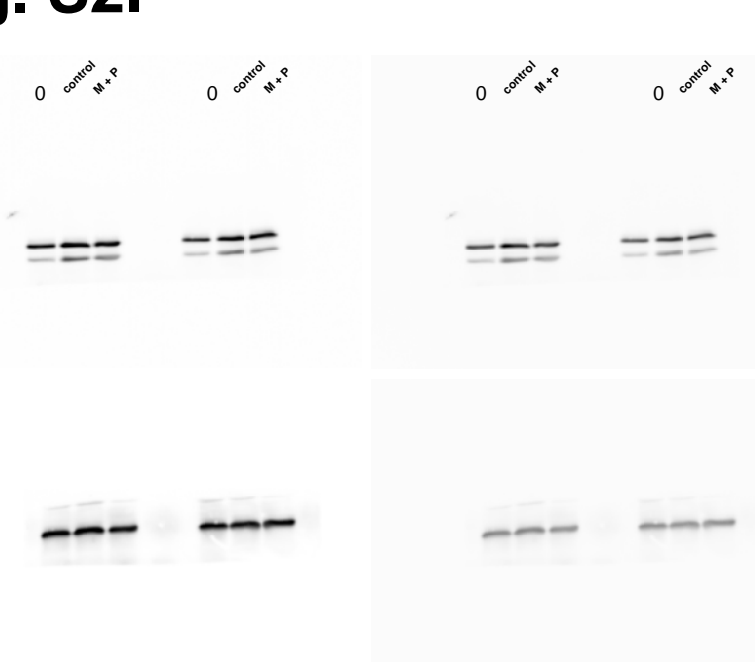

Supplement: 41598_2021_87525_MOESM1_ESM.pdf [file 41598_2021_87525_MOESM1_ESM.pdf]
